# Supplementary material for: IFN-γ Mediates the Development of Systemic Lupus Erythematosus
Source: Biomed Res Int. 2020 Oct 17;2020:7176515. doi: 10.1155/2020/7176515 (PMC7586164; doi:10.1155/2020/7176515)
Supplement: Supplementary Materials — of Table 1: the results of differentially expressed genes (DEGs) of healthy and newly diagnosed SLE population. [file 7176515.f1.xls]

## Sheet: diffExp
Gene	logFC	P.Value	adj.P.Val	group
HSPB1	3.28762	1.86e-07	0.000772373	up
RSAD2	4.51929	2.13e-07	0.000772373	up
NR2F6	-2.80728	2.37e-07	0.000772373	down
OAS2	2.91719	3.69e-07	0.000772373	up
OASL	3.24212	3.95e-07	0.000772373	up
IFIT1	4.03267	4.53e-07	0.000772373	up
HERC5	2.93334	4.57e-07	0.000772373	up
OAS3	3.07517	4.57e-07	0.000772373	up
SPATS2L	2.71178	6.61e-07	0.000991897	up
IFIT3	2.95651	8.12e-07	0.00109768	up
ISG15	3.29498	1.36e-06	0.00166499	up
LGALS3BP	3.70153	1.51e-06	0.00170547	up
EMP1	2.96811	1.66e-06	0.0017164	up
IFI27	8.18505	1.78e-06	0.0017164	up
IFI44L	3.73068	1.9e-06	0.0017164	up
SIGLEC1	3.68564	2.07e-06	0.00174847	up
IFITM1	4.16869	2.83e-06	0.00218892	up
MX2	2.08427	2.92e-06	0.00218892	up
LY6E	3.51251	3.41e-06	0.00241013	up
HESX1	3.92887	3.57e-06	0.00241013	up
TDRD7	1.71006	4.55e-06	0.00292598	up
USP18	4.56844	6.12e-06	0.00376014	up
IFI44	2.56765	6.99e-06	0.00410775	up
CUL1	2.00592	7.57e-06	0.00426469	up
TOR1B	2.01181	8.3e-06	0.00448887	up
RTP4	1.91413	9.72e-06	0.00505345	up
IFI6	3.32335	1.18e-05	0.00591209	up
PARP12	1.91973	1.36e-05	0.00627254	up
RP11-209A2.1	-1.4771	1.36e-05	0.00627254	down
IFITM1	4.44915	1.47e-05	0.00627254	up
IFI35	2.26126	1.53e-05	0.00627254	up
MX1	3.31279	1.55e-05	0.00627254	up
EIF2AK2	1.64346	1.57e-05	0.00627254	up
RASGRP3	3.07433	1.58e-05	0.00627254	up
EMR3	-3.2439	1.74e-05	0.00670286	down
KIF21B	1.74409	1.8e-05	0.00676027	up
IFIH1	2.10179	1.85e-05	0.00676418	up
LTF	5.4901	2e-05	0.00709667	up
TAP1	1.91894	2.07e-05	0.007157	up
EEF1B2	-1.44564	2.33e-05	0.00786848	down
XAF1	1.95155	2.53e-05	0.00833286	up
SAMD9	1.80914	2.84e-05	0.00914648	up
IFITM2	2.19162	3.06e-05	0.00961542	up
ARID5B	2.22211	3.24e-05	0.00995011	up
DDX60	2.34254	3.6e-05	0.0107982	up
IFIT5	1.85482	3.85e-05	0.0112731	up
IFIT2	2.55875	3.92e-05	0.0112731	up
TRIM22	1.18124	4.17e-05	0.0116283	up
SORL1	-1.37432	4.22e-05	0.0116283	down
CHMP5	1.18185	4.35e-05	0.0117606	up
PLSCR1	1.38857	4.57e-05	0.0119487	up
IFITM3	2.83996	4.6e-05	0.0119487	up
PSMB9	1.54671	4.72e-05	0.0120321	up
RP4-781L3.1	3.13075	4.87e-05	0.0120321	up
NAT1	1.18419	4.91e-05	0.0120321	up
APOL6	3.01031	4.99e-05	0.0120321	up
C1orf56	-1.04915	6.92e-05	0.0164137	down
ATP10A	2.07949	7.16e-05	0.0165342	up
HERC6	2.31549	7.22e-05	0.0165342	up
GPR18	3.30613	7.73e-05	0.0174071	up
IPO5	-1.21119	7.95e-05	0.0174913	down
LHFPL2	1.51388	8.02e-05	0.0174913	up
UBE2L6	1.49595	8.25e-05	0.0176922	up
TRIM34	1.37887	8.43e-05	0.0177961	up
OLFM1	-2.73296	8.9e-05	0.0185085	down
ETNK1	1.00398	0.000105279	0.0215497	up
EIF3L	-1.59005	0.000106832	0.0215497	down
IRF7	1.78986	0.000111131	0.0218262	up
RHOB	1.91925	0.000111432	0.0218262	up
ZBP1	2.26114	0.000118509	0.0228807	up
SKI	-3.01073	0.000121366	0.0231022	down
KIAA0509	2.39397	0.000123752	0.0232292	up
LAP3	1.4921	0.0001399	0.0259007	up
PRR7	1.62206	0.000144968	0.0264763	up
HYAL4	-2.0267	0.000157906	0.0284547	down
BST2	1.44084	0.000178597	0.0309673	up
IL1RN	1.45869	0.000179178	0.0309673	up
RNASE2	1.81586	0.000182351	0.0309673	up
STAT1	1.24443	0.00018375	0.0309673	up
FCGR1B	1.9419	0.000185597	0.0309673	up
TNFSF10	1.43335	0.000196619	0.0321882	up
C9orf38	-1.74936	0.000202771	0.0321882	down
IFI16	1.09907	0.000202848	0.0321882	up
PTPRF	-2.60967	0.000203133	0.0321882	down
ATAD2B	1.13683	0.000204823	0.0321882	up
PID1	-3.39622	0.00021266	0.0325651	down
DEFA1	4.56211	0.000213924	0.0325651	up
TRIM21	1.40202	0.000215839	0.0325651	up
DDX58	2.02674	0.000217582	0.0325651	up
ENPP4	1.37641	0.000222942	0.0325651	up
CTSL	1.71759	0.000223574	0.0325651	up
CCL2	5.12777	0.000224088	0.0325651	up
CCR5	1.43147	0.000229796	0.0330392	up
OTOF	3.24951	0.000236932	0.0337067	up
STAP1	3.30659	0.000243742	0.0343143	up
GCH1	1.08992	0.000251095	0.034985	up
UNG	-1.04724	0.000259377	0.0353785	down
IGF2BP3	1.42076	0.000261288	0.0353785	up
CRNKL1	1.35296	0.000261772	0.0353785	up
PELO	1.31552	0.000273847	0.036644	up
MROH7	-1.83871	0.000284569	0.0369802	down
ATP6V0C	1.33117	0.000289601	0.0372757	up
ZCCHC2	1.26302	0.000313669	0.0399928	up
SLC1A1	2.204	0.000335788	0.0419749	up
ETV7	1.4355	0.000336778	0.0419749	up
ANXA4	1.21353	0.000339096	0.0419749	up
OPTN	2.66515	0.000341638	0.0419749	up
CXCL10	2.93141	0.000345307	0.0420293	up
CHST3	-1.79836	0.000349926	0.0420293	down
ADAR	1.21782	0.000352659	0.0420293	up
PLAC8	1.97311	0.000359838	0.0420293	up
AKR1B10	-2.50684	0.000360308	0.0420293	down
FOXO1	-1.19732	0.000364948	0.0420293	down
CRTAP	-1.20785	0.000368182	0.0420293	down
Y16709	-1.23623	0.000368532	0.0420293	down
PABPC4	-1.15902	0.000370069	0.0420293	down
SYNC	-1.20306	0.000379938	0.0427905	down
HIST2H2AA3 /// HIST2H2AA4	1.29387	0.000396655	0.0443041	up
LGALS9	1.28181	0.000406	0.0446519	up
NR1D2	-1.37204	0.000406377	0.0446519	down
ZNF266	-1.07838	0.000411486	0.0446966	down
RPL4	-1.01394	0.000419979	0.0446966	down
MS4A4A	2.55178	0.000420435	0.0446966	up
SCO2	1.02155	0.000435808	0.0456584	up
SCCPDH	1.46634	0.000439508	0.0456919	up
PLAGL1	-1.28635	0.00044557	0.0458105	down
SP110	1.01688	0.000447428	0.0458105	up
FCGR1A	1.9965	0.000460351	0.0463014	up
SQLE	1.33508	0.0004625	0.0463014	up
CIITA	-1.08643	0.000471334	0.0465598	down
PFKP	1.09156	0.000471972	0.0465598	up
EEF1A1P42	-1.5779	0.000483555	0.0473568	down
GBP1	2.01517	0.000493324	0.047966	up
CD38	2.26348	0.000517541	0.0499612	up
